# Supplementary material for: Channel Formation in Cry Toxins: An Alphafold-2 Perspective
Source: MDPI journal article supplement (doi:10.3390/ijms242316809), 2023-11-27
Supplement: s1 [file s1]

**Supplementary File.**

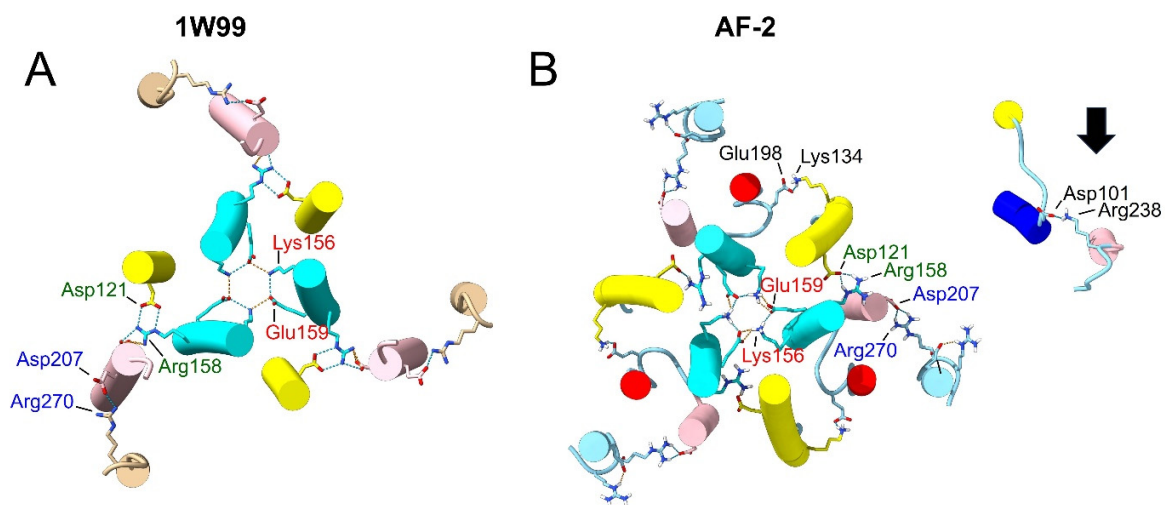

**Supplementary Figure S1. Comparison of critical salt bridges in domain I between crystal and AF2-predicted Cry4Ba trimeric structures.** (A) Top view of Cry4Ba domain I trimer (PDB:1W99) showing only the parts of the molecule involved in salt bridges; (B) same as (A) for the AF2-predicted structure. Three salt bridges common to the two structures are shown in the same label color (red, blue and green) and only one is inter-monomeric (red), involving  $\alpha 4$  residues Lys156 and Glu159. In both models, helix  $\alpha 4$  also has salt bridges via Arg158 with helices  $\alpha 3$  and  $\alpha 6$ . Arrow: in the N-terminal fragment that was missing in the 1W99 crystal structure, AF2 finds another salt bridge, between Asp101 ( $\alpha 2b$ ) and Arg238 ( $\alpha 6$ ).

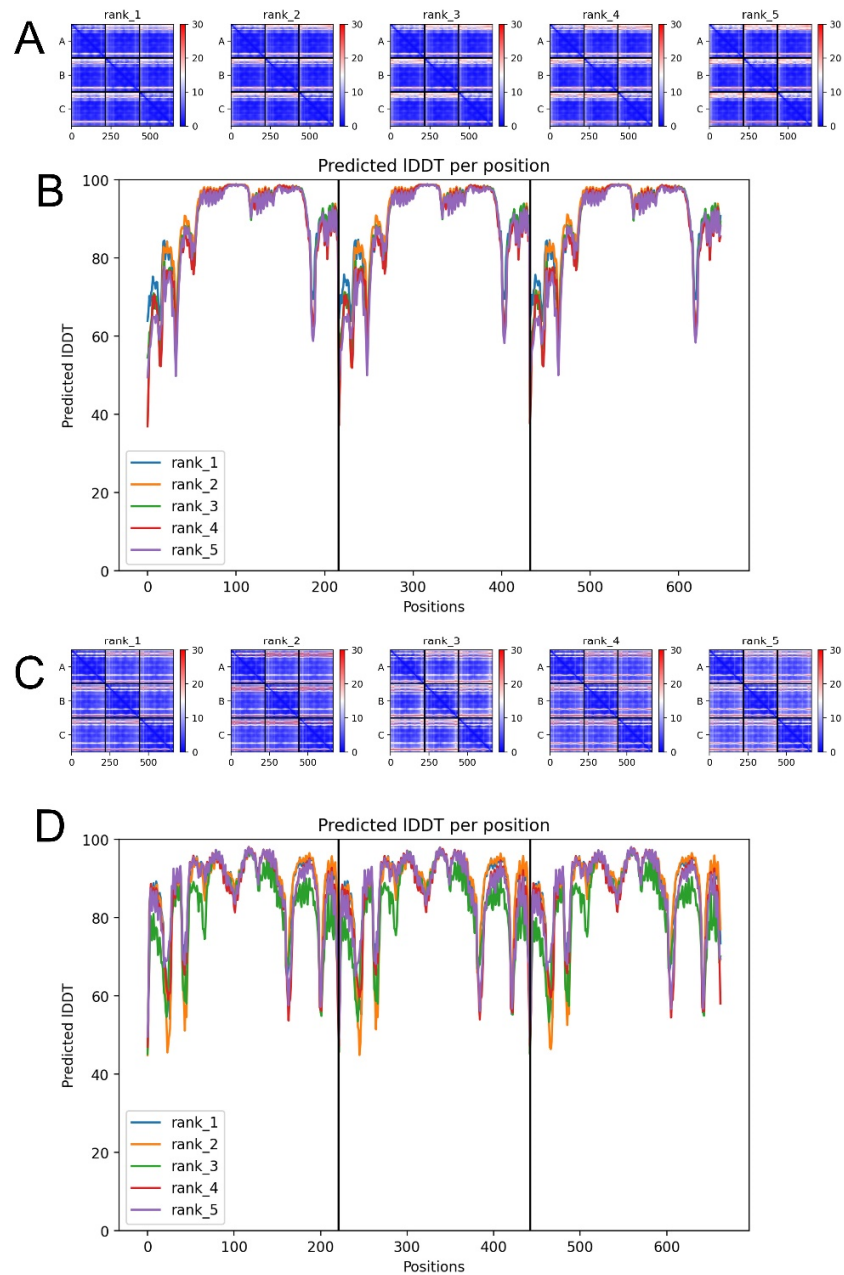

**Supplementary Figure S2. Quality of trimeric domain I models of Cry1Aa (residues 35-250) and Cry4Ba.** (A) PAE plots for models rank 1-5; (B) same as (A) showing a pLDDT plot, which is lower for the first ~36 residues (equivalent to residues 51-87, i.e.,  $\alpha 2a$  and  $\alpha 2b$ ); (C-D), same as (A-B) for Cry4Ba (40-250).

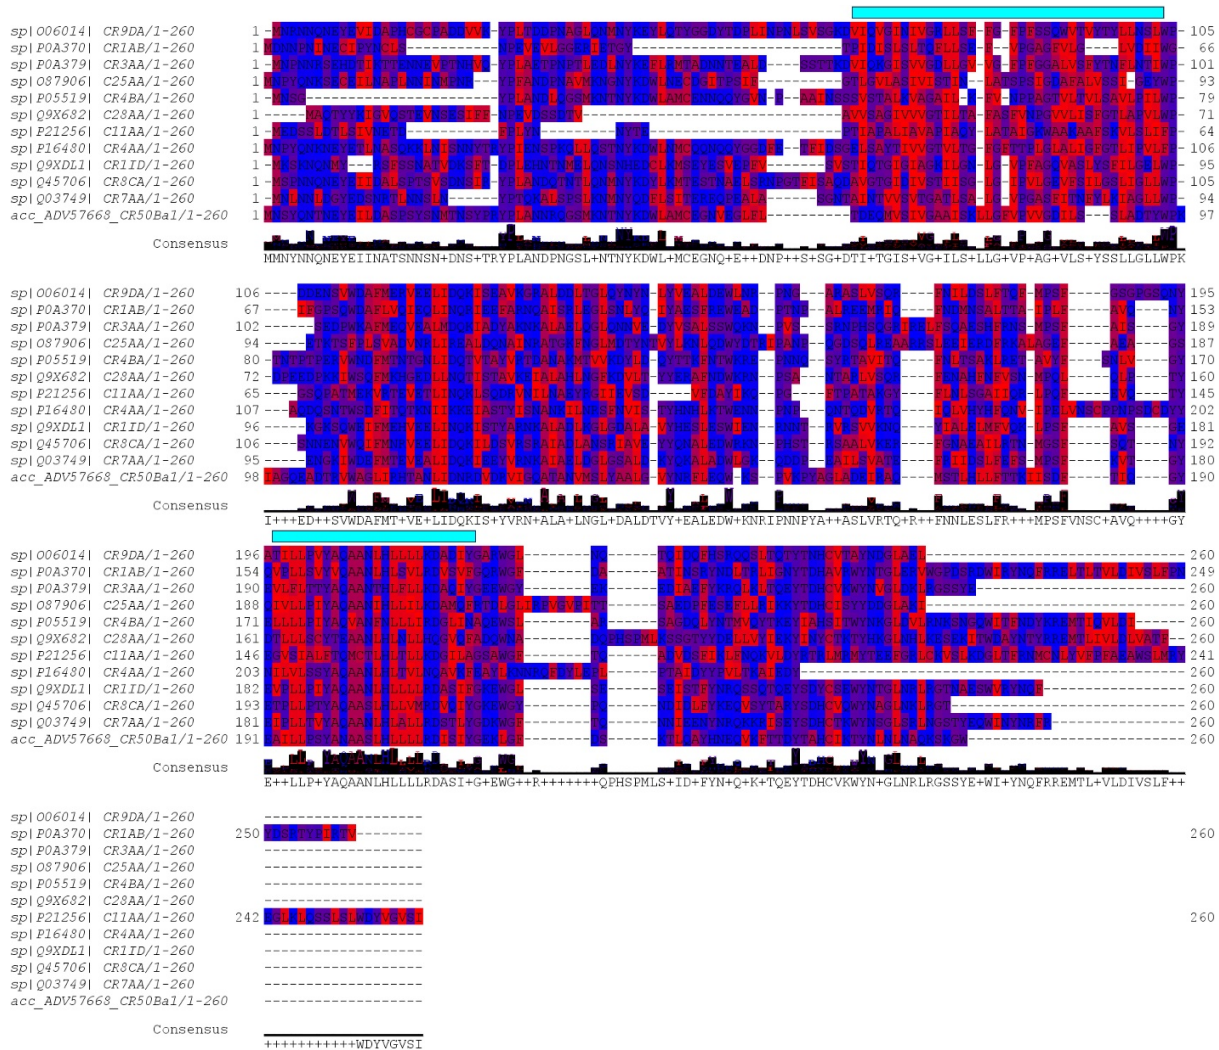

**Supplementary Figure S3.** Hydrophobicity output generated in Jalview for selected Cry toxins (Swiss Prot code indicated, except for Cry50Ba1 which only has GenBank accession number). Red: hydrophobic; blue, polar. The two most hydrophobic regions ( $\alpha 1$ - $\alpha 2$  and  $\alpha 5$ ) in all sequences are below a cyan bar.

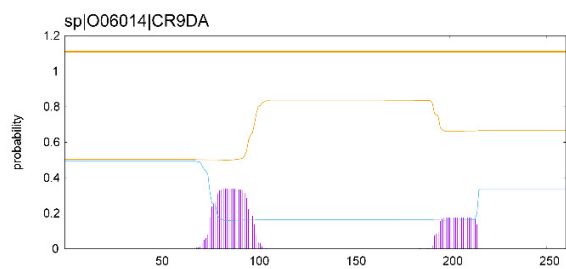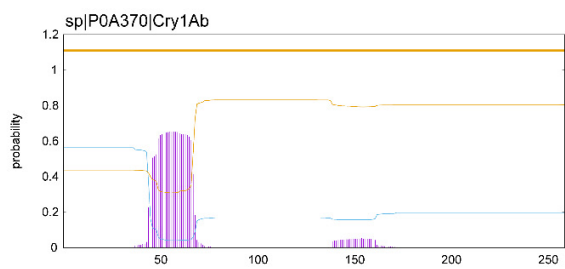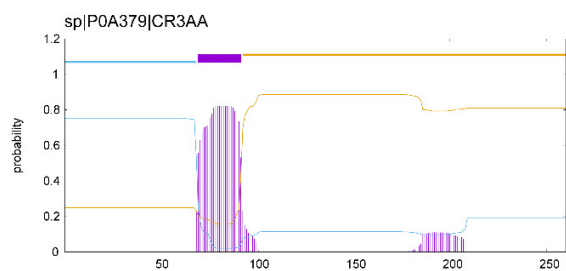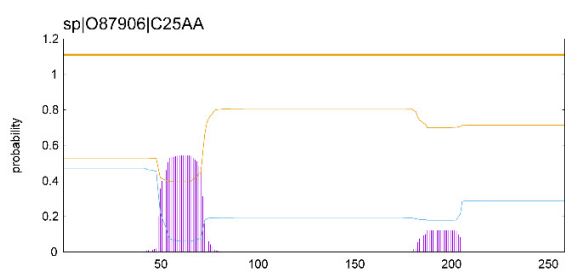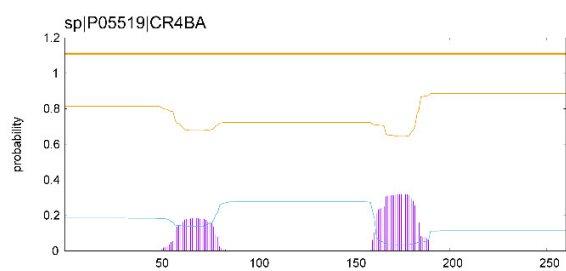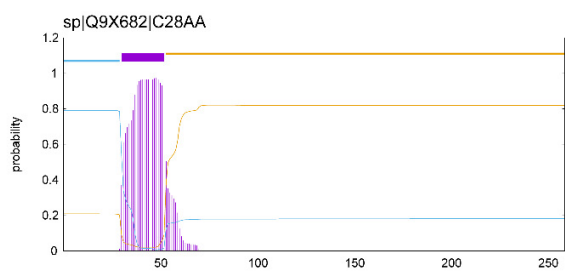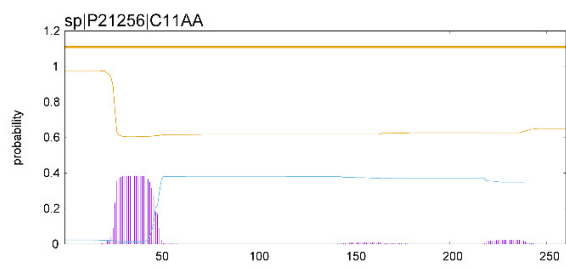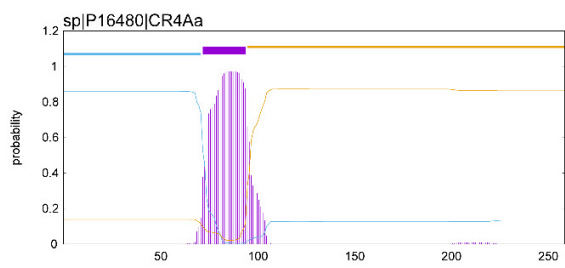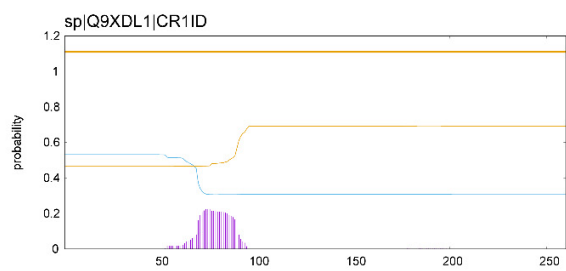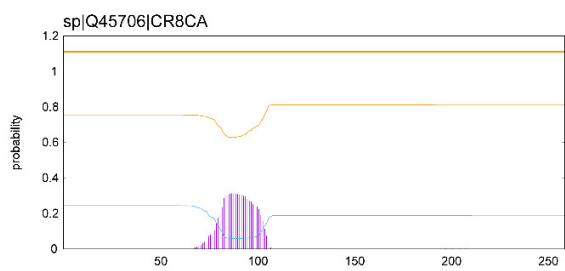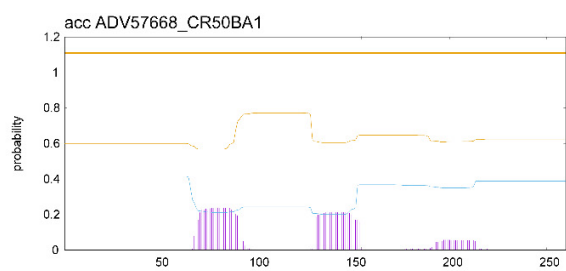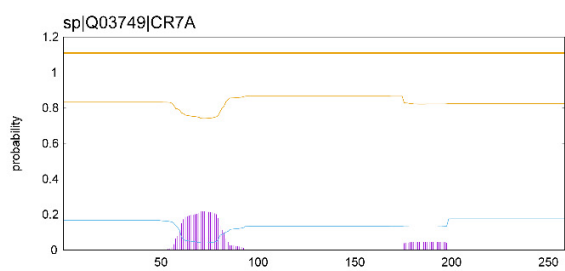

**Supplementary Figure S4.** TM domain prediction (purple) by TMHMM for Cry toxins shown in Supplementary Fig. S3 (Swiss-Prot code indicated). The codes were chosen from the list ‘List of *Bacillus thuringiensis* Holotype Toxins’, except for Cry50Ba1 (Cry50-like protein) which only has GenBank accession number. Blue and yellow lines represent the probability of cytoplasmic or luminal (extracellular) topology, respectively.

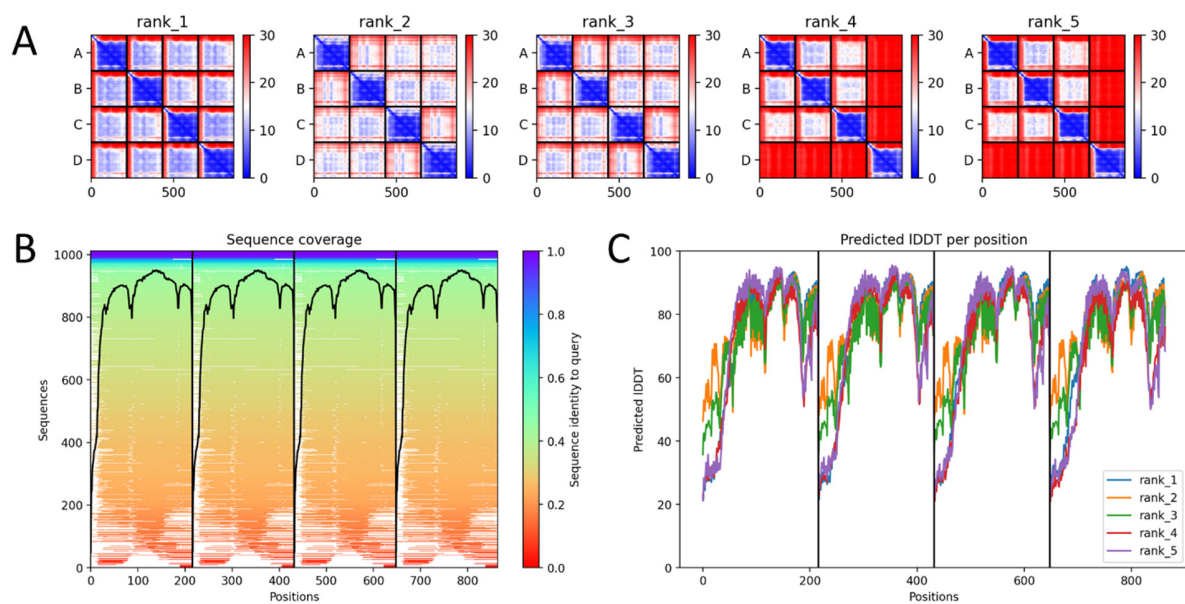

**Supplementary Figure S5. AF-2 structure prediction of the tetrameric Cry1Aa domain I (35-250).** (A) PAE plots for the best 5 models (rank 1-5). The PAE scale is shown on the right where low (blue) is optimal and high (red) is unsuitable; (B) MSA; (C) pLDDT.



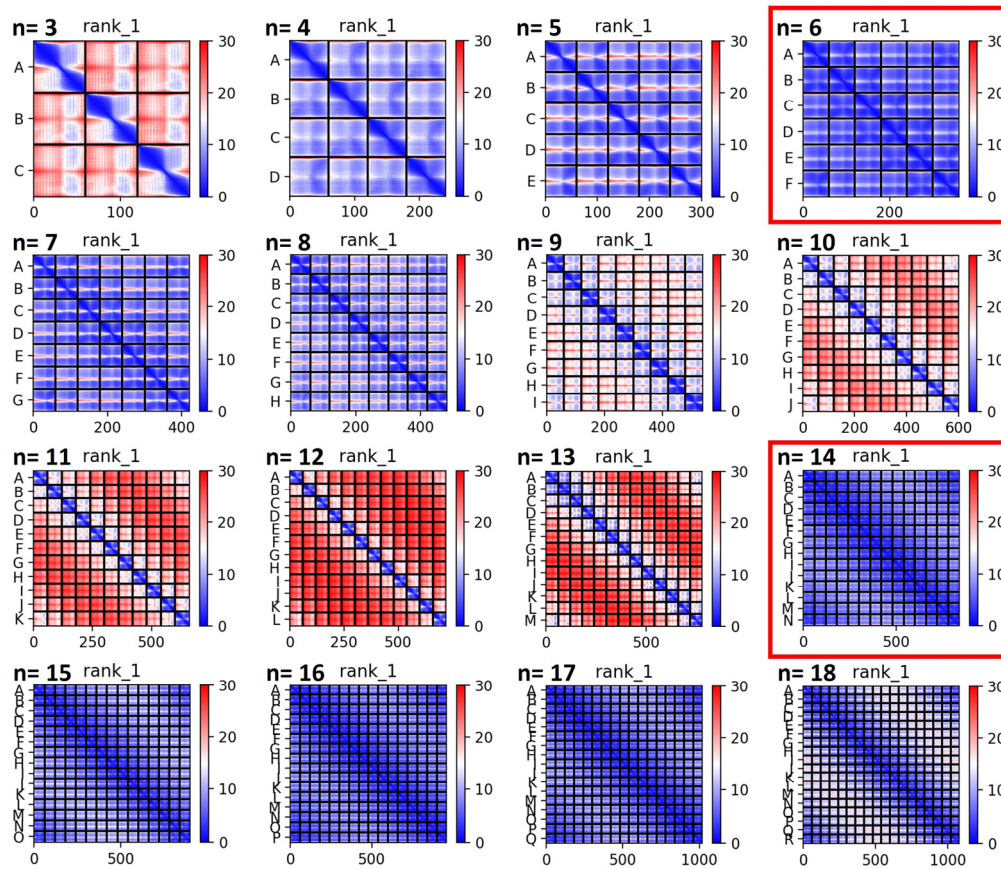

**Supplementary Figure S6. AF-2 structure prediction of oligomers of Cry1Aa helix 4 and 5 hairpin.** PAE plots for the best (rank 1) models of sizes from 3 to 18. The Predicted Alignment error (PAE) scale is shown on the right where low (blue) is optimal and high (red) is unsuitable. Optimal plots (n = 6, 14) are highlighted.

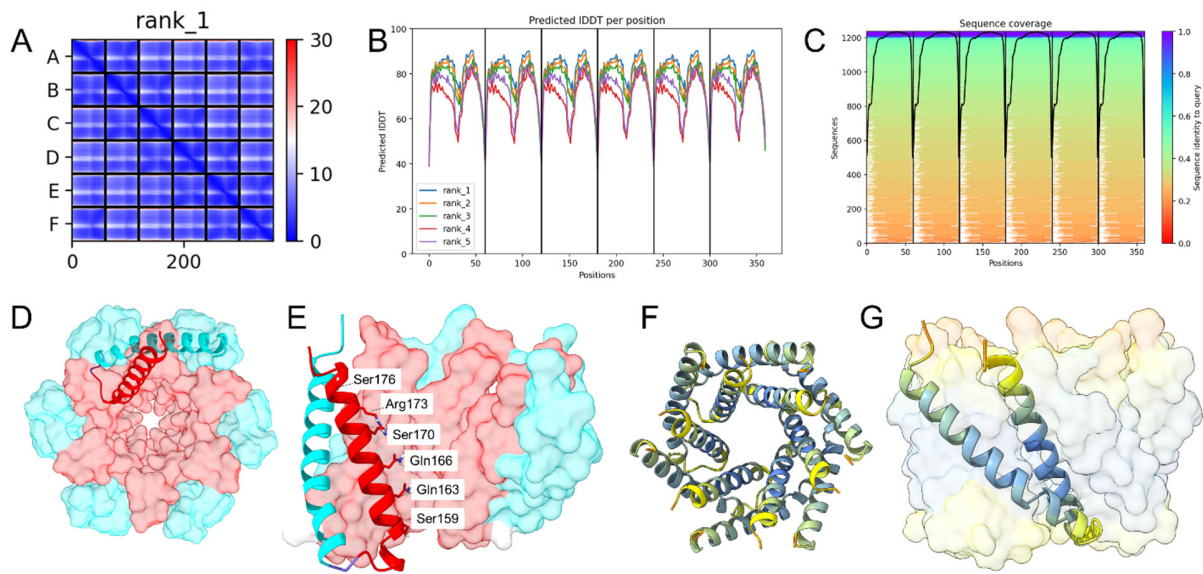

**Supplementary Figure S7. AF-2 structure prediction of hexameric Cry1Aa  $\alpha 4$ - $\alpha 5$  hairpin.** (A) PAE plots for the best model. The PAE scale is shown on the right where low (blue) is optimal and high (red) is unsuitable; (B) pLDDT; (C) MSA; (D) hexameric pore formed by  $\alpha 4$  (cyan) and  $\alpha 5$  (red)  $\alpha$ -helices of Cry1Aa, where the latter is lining the pore; (E) side view, with polar residues of  $\alpha 5$  lining the pore as indicated, and where three monomers have been removed for clarity; (F) helix tilt of helices  $\alpha 4$  and  $\alpha 5$  in the hexameric model.

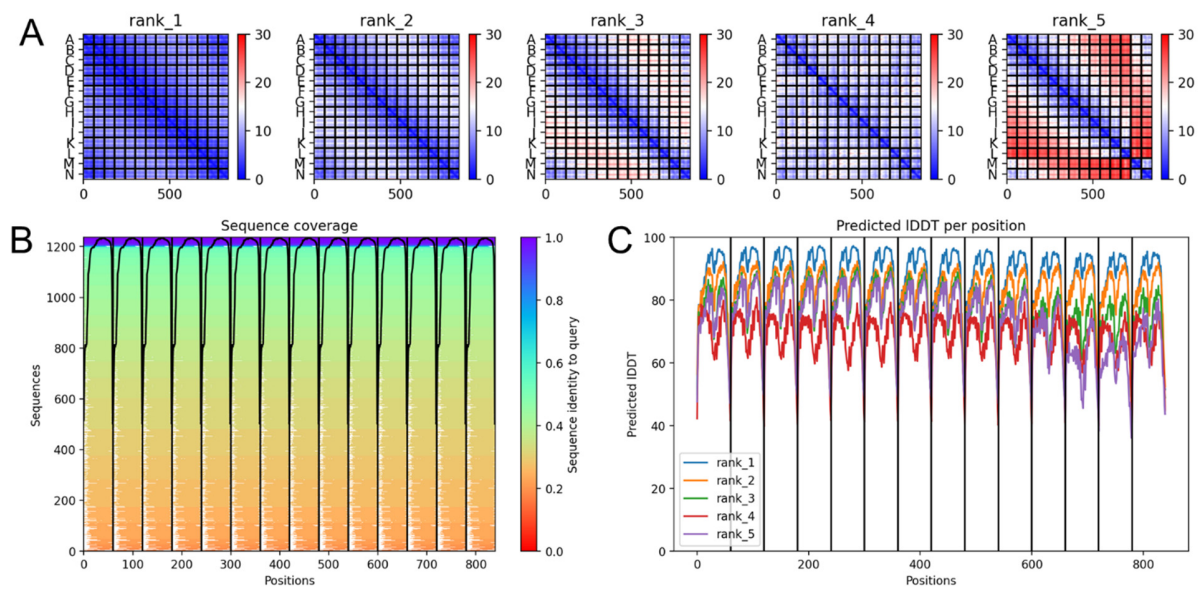

**Supplementary Figure S8. AF-2 structure prediction of Cry1Aa 14-mer  $\alpha 4$ - $\alpha 5$  hairpin.** (A) PAE plots for the best model. The PAE scale is shown on the right where low (blue) is optimal and high (red) is unsuitable; (B) MSA; (C) pLDDT.
